# Supplementary material for: Highly selective PdZn/ZnO catalysts for the methanol steam reforming reaction
Source: Royal Society of Chemistry journal article supplement (doi:10.1039/c8cy01100a), 2018-01-01
Supplement: c8cy01100a1.pdf [file c8cy01100a1.pdf]

## Supplementary Information

### High selectivity PdZn/ZnO catalysts for methanol steam reforming reaction

Ewa Nowicka,<sup>a</sup> Sultan M. Althahban,<sup>b</sup> Yuan Luo,<sup>c</sup> René Kriegel,<sup>d</sup> Greg Shaw,<sup>a</sup> David J. Morgan,<sup>a</sup> Qian He,<sup>a</sup> Masashi Watanabe,<sup>b</sup> Marc Armbrüster,<sup>d</sup> Christopher J. Kiely<sup>a,b</sup> and Graham J. Hutchings<sup>\*a</sup>

<sup>a</sup> *Cardiff Catalysis Institute, School of Chemistry, Cardiff University, Main Building, Park Place, Cardiff, CF10 3AT, UK*

<sup>b</sup> *Department of Materials Science and Engineering, Lehigh University, 5 East Packer Avenue, Bethlehem, PA 18015-3195, USA*

<sup>c</sup> *Max-Planck-Institut für Chemische Physik fester Stoffe, Nöthnitzer Strasse 40, 01187 Dresden, Germany*

<sup>d</sup> *Faculty of Natural Sciences, Institute of Chemistry, Materials for Innovative Energy Concepts, Chemnitz University of Technology, 09107 Chemnitz, Germany*

*\*Correspondence to Graham J. Hutchings, e-mail: hutch@cardiff.ac.uk*

## List of Contents

**Figure S1.** Equilibrium calculations relating to the methanol steam reforming reaction: a) temperature dependence of methanol conversion and CO<sub>2</sub> selectivity at equilibrium; b) temperature dependence of relative abundances of gases in the equilibrium state when methanol steam reforming, methanol decomposition and water gas shift were taken into account (p = 1 bar; MeOH: H<sub>2</sub>O ratio 1:1) [1]

**Figure S2.** Powder XRD analysis of the bare ZnO<sub>nano</sub> support after treatment with HCl.

**Figure S3.** Pd(3d) XPS spectrum obtained from the fresh M<sub>Imp</sub> derived 3wt%PdZn/ZnO<sub>nano</sub> sample.

**Figure S4.** Pd(3d) XPS spectrum obtained from a PdCl<sub>2</sub> reference sample.

**Figure S5.** STEM-XEDS elemental maps of the unused M<sub>Imp</sub> 3%PdZn/ZnO catalyst showing the elemental distribution of Pd, Cl, Zn and O.

**Figure S6.** STEM-XEDS elemental maps of the unused C<sub>Imp</sub> 3%PdZn/ZnO catalyst showing the elemental distribution of Pd, Cl, Zn and O.

**Figure S1.** Equilibrium calculations relating to the methanol steam reforming reaction: a) temperature dependence of methanol conversion and CO<sub>2</sub> selectivity at equilibrium; b) temperature dependence of relative abundances of gases in the equilibrium state when methanol steam reforming, methanol decomposition and water gas shift were taken into account. (p = 1 bar; MeOH: H<sub>2</sub>O ratio 1:1) [1].

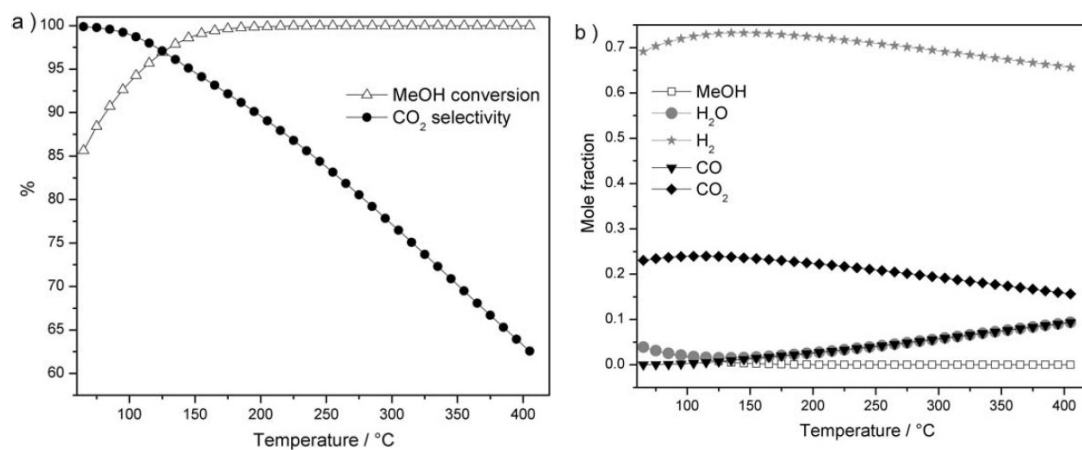

**Figure S2.** Powder XRD analysis of the bare ZnO<sub>nano</sub> support after treatment with HCl.  
*Legend:* Reflections from Zn<sub>5</sub>Cl<sub>2</sub>H<sub>10</sub>O<sub>9</sub> (●) and ZnO (Δ).

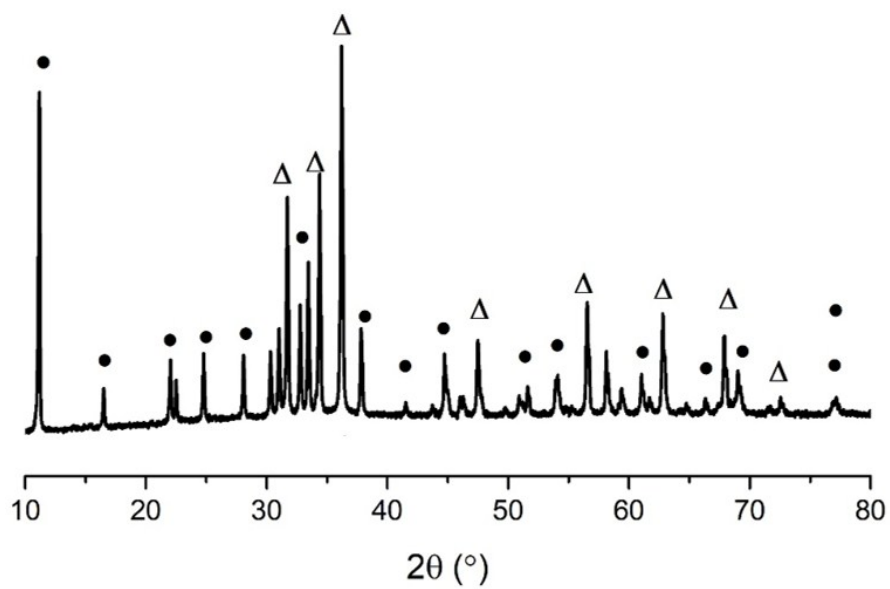

**Figure S3.** Pd(3d) XPS spectrum obtained from the fresh  $M_{\text{Imp}}$  derived 3wt%PdZn/ZnO<sub>nano</sub> sample. The Pd(3d<sub>5/2</sub>) peak is found to be centered at 337.4 eV and taken together with the peak shape, is consistent with the presence of Pd-Cl species as shown in Figure S4.

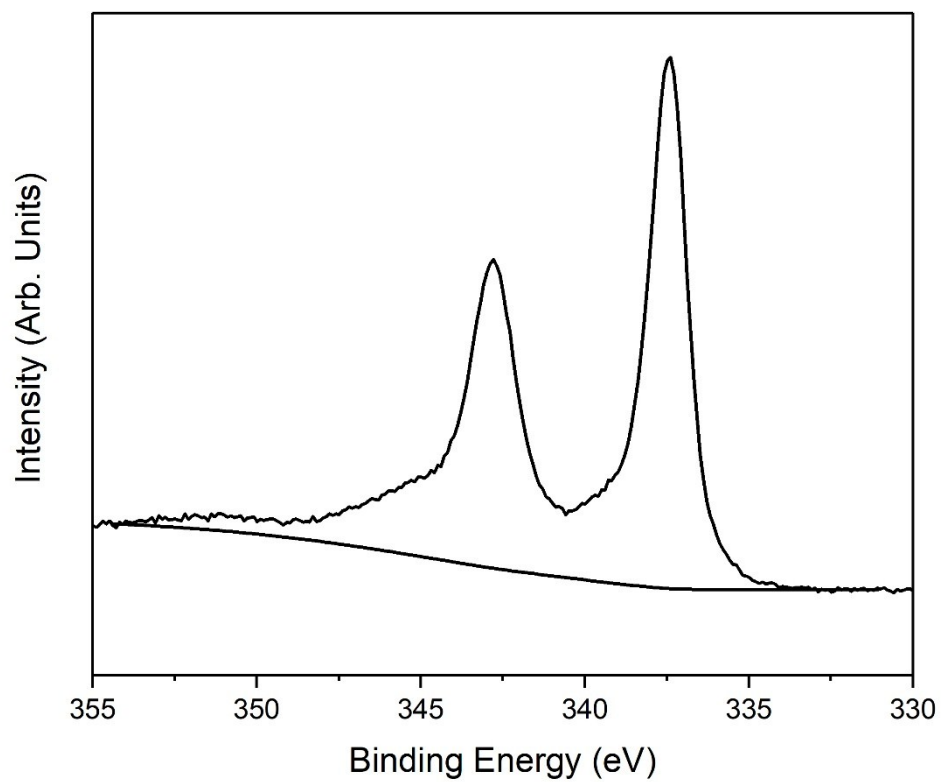

**Figure S4.** Pd(3d) XPS spectra obtained from a bulk PdCl<sub>2</sub> reference sample. The Pd(3d<sub>5/2</sub>) binding energy is 337.5 eV and the Cl/Pd ratio found to be 1.92 which is close to the expected stoichiometry.

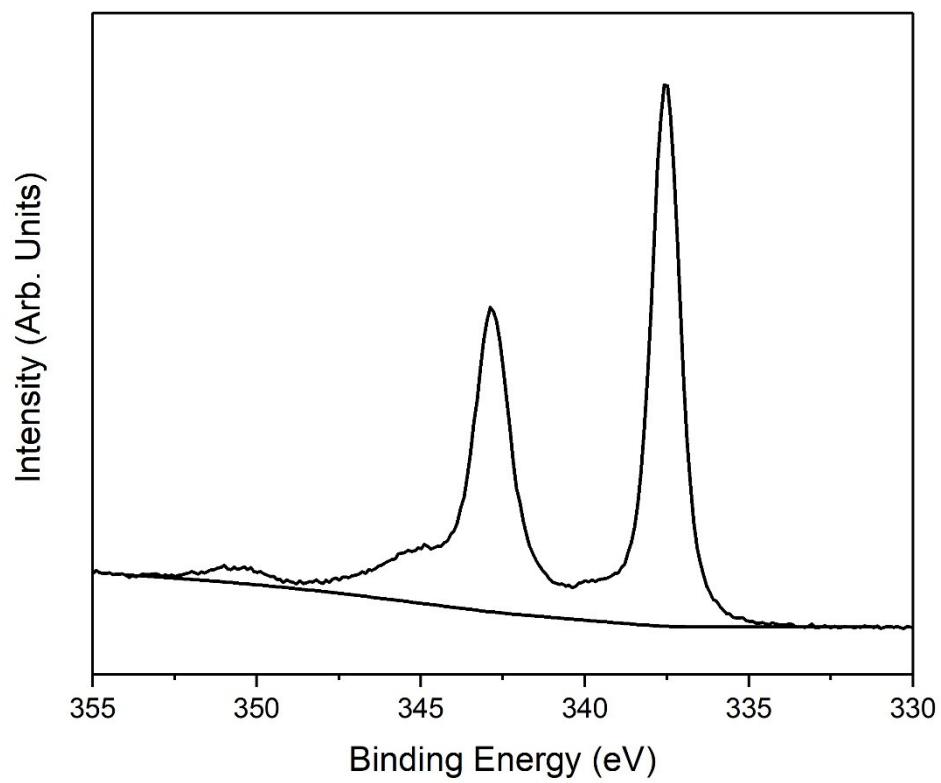

**Figure S5.** STEM-XEDS elemental maps of the unused  $M_{\text{imp}}$  3%PdZn/ZnO catalyst showing the elemental distribution of Pd, Cl, Zn and O. The Cl signal is at the noise level (1-3 counts).

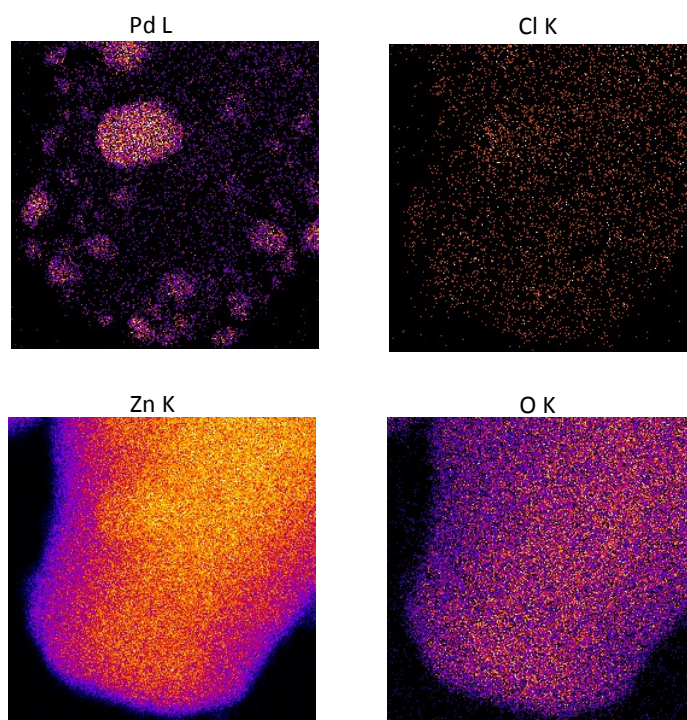

**Figure S6.** STEM-XEDS elemental maps of the unused  $C_{\text{Imp}}$  3%PdZn/ZnO catalyst showing the elemental distribution of Pd, Cl, Zn and O. The Cl signal is at the noise level (1-3 counts).

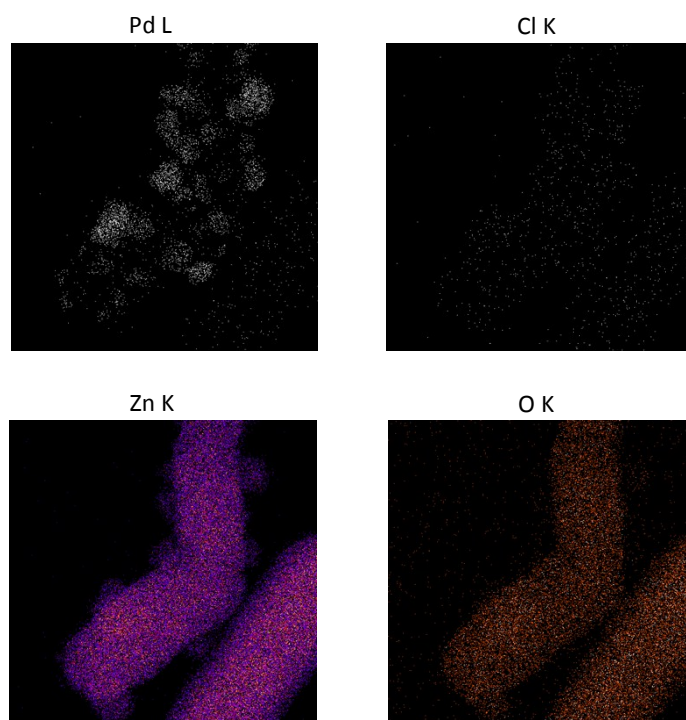

**Reference:**

[1] Y. Luo, *Unsupported Nanoparticulate ZnPd: Systematic Preparation and Performances in Methanol Steam Reforming*. 2013 PhD Thesis, Institute of Coal Chemistry, Chinese Academy of Sciences, Taiyuan; Max-Planck Institut für Chemische Physik fester Stoffe, Dresden.
